# 1 Identification of Fibronectin 1 as a candidate genetic modifier in a *Col4a1* mutant mouse 2 model of Gould syndrome 3

4 Mao Mao<sup>1</sup>, Tanav Popli<sup>1§</sup>, Marion Jeanne<sup>1#</sup>, Kendall Hoff<sup>1+</sup>, Saunak Sen<sup>2,3,4</sup>, and Douglas B.  
5 Gould<sup>1,3,5\*</sup>  
6  
7

8 <sup>1</sup>Departments of Ophthalmology, University of California, San Francisco, San Francisco, CA. 94143,  
9 USA; <sup>2</sup>Department of Epidemiology and Biostatistics, University of California, San Francisco, San  
10 Francisco, CA. 94143, USA; <sup>3</sup>Institute of Human Genetics, University of California, San Francisco,  
11 San Francisco, CA. 94143, USA; <sup>4</sup>Department of Preventive Medicine, University of Tennessee  
12 Health Science Center, 66 North Pauline St, Memphis, TN 38163 USA; <sup>5</sup>Department of Anatomy,  
13 University of California, San Francisco, San Francisco, CA 94143, USA  
14

15 \*Corresponding author:

16 Dr. Douglas B. Gould, Departments of Ophthalmology and Anatomy, Institute for Human Genetics,  
17 UCSF School of Medicine, 10 Koret Way, Room 235, San Francisco, CA, 94143-0730, (415) 476-  
18 3592 (telephone), [Douglas.Gould@ucsf.edu](mailto:Douglas.Gould@ucsf.edu), ORCID identifier number 0000-0001-5127-5328

19 <sup>§</sup>Current address: University of Michigan, Department of Neurology, 1500 E Medical Center Drive,  
20 Taubman Center, Clinic 1C, Ann Arbor, MI, 48109

21 <sup>#</sup>Current address: Genentech Inc, 1 DNA Way, South San Francisco, CA 94080

22 <sup>+</sup>Current address: Centrillion Technologies, 2500 Faber Pl. Palo Alto, CA 94303  
23  
24

## 25 **Key words:**

26 Gould syndrome, COL4A1, basement membrane, modifier, fibronectin, integrin signaling  
27

## SUMMARY STATEMENT

28

29 A genetic screen in mice implicates FN1 as a genetic modifier of some, but not all, aspects of Gould  
30 syndrome.

## 31 **ABSTRACT**

32 Collagen type IV alpha 1 and alpha 2 (COL4A1 and COL4A2) are major components of almost all  
33 basement membranes. *COL4A1* and *COL4A2* mutations cause a multisystem disorder called Gould  
34 syndrome which can affect any organ but typically involves the cerebral vasculature, eyes, kidneys and  
35 skeletal muscles. The manifestations of Gould syndrome are highly variable and animal studies suggest  
36 that allelic heterogeneity and genetic context contribute to the clinical variability. We previously  
37 characterized a mouse model of Gould syndrome caused by a *Col4a1* mutation in which the severities  
38 of ocular anterior segment dysgenesis (ASD), myopathy, and intracerebral hemorrhage (ICH) were  
39 dependent on genetic background. Here, we performed a genetic modifier screen to provide insight  
40 into the mechanisms contributing to Gould syndrome pathogenesis and identified a single locus  
41 (*modifier of Gould syndrome 1; MoGS1*) on Chromosome 1 that suppressed ASD. A separate screen  
42 showed that the same locus ameliorated myopathy. Interestingly, *MoGS1* had no effect on ICH,  
43 suggesting that this phenotype may be mechanistically distinct. We refined the *MoGS1* locus to a 4.3  
44 Mb interval containing 18 protein coding genes, including *Fn1* which encodes the extracellular matrix  
45 component fibronectin 1. Molecular analysis showed that the *MoGS1* locus increased *Fn1* expression  
46 raising the possibility that suppression is achieved through a compensatory extracellular mechanism.  
47 Furthermore, we show evidence of increased integrin linked kinase levels and focal adhesion kinase  
48 phosphorylation in *Col4a1* mutant mice that is partially restored by the *MoGS1* locus implicating the  
49 involvement of integrin signaling. Taken together, our results suggest that tissue-specific mechanistic  
50 heterogeneity contributes to the variable expressivity of Gould syndrome and that perturbations in  
51 integrin signaling may play a role in ocular and muscular manifestations.

## 52 INTRODUCTION

53 Collagens are the most abundant proteins in the body, making up ~30% of the dry weight. The collagen  
54 superfamily of extracellular matrix (ECM) molecules comprises 28 members encoded by 46 genes  
55 (Ricard-Blum, 2011). Among these, type IV collagens are primordial ECM molecules and are  
56 fundamental constituents of specialized structures called basement membranes (Fidler et al., 2017). In  
57 mammals, six genes encode the type IV collagens (*COL4A1* to *COL4A6*) and their protein products  
58 assemble into three distinct heterotrimers ( $\alpha1\alpha1\alpha2$ ,  $\alpha3\alpha4\alpha5$  or  $\alpha5\alpha5\alpha6$ ). The  $\alpha1\alpha1\alpha2$  network is  
59 ubiquitous throughout development and in most adult tissues and its absence results in embryonic  
60 lethality (Poschl et al., 2004). Pathogenic mammalian *Col4a1* mutations were first identified using  
61 forward mutagenesis screens in mice with variable forms of ocular pathology (Favor et al., 2007; Gould  
62 et al., 2005; Thaug et al., 2002) and human mutations were identified in individuals with severe  
63 inherited or *de novo* porencephaly and early onset intracerebral hemorrhages (ICH) (Breedveld et al.,  
64 2006; Gould et al., 2005; Gould et al., 2006; Sibon et al., 2007; Vahedi et al., 2007). A number of studies  
65 in humans and mice have subsequently expanded the phenotypic spectrum and it is now well  
66 established that mutations in *COL4A1* and *COL4A2* cause a multi-system disorder (Jeanne and Gould,  
67 2017; Labelle-Dumais et al., 2019; Mao et al., 2015; Meuwissen et al., 2015; Yoneda et al., 2013;  
68 Zagaglia et al., 2018) that has adopted the name Gould syndrome  
69 (<https://www.gouldsyndrome.foundation.org>).

70  
71 Gould syndrome is highly clinically heterogeneous and can have variable penetrance and severity  
72 across many organs. Cerebrovascular, ocular, renal and neuromuscular pathologies are among the  
73 most commonly described manifestations. We originally described a mouse model of Gould syndrome  
74 with a *Col4a1* splice acceptor mutation that leads to exclusion of exon 41 ( $\Delta$ ex41) from the mature  
75 transcript and 17 amino acids from the triple-helical domain of the protein (Gould et al., 2005). However,  
76 the majority of disease-causing variants reported in humans are missense mutations in highly  
77 conserved glycine residues of the triple-helical domain (Jeanne and Gould, 2017). In order to faithfully  
78 replicate human disease, we compared the effects of different mutations in an allelic series composed  
79 of nine distinct *Col4a1* and *Col4a2* mutant mouse strains (Favor et al., 2007; Jeanne et al., 2015; Kuo  
80 et al., 2014). We established that allelic heterogeneity has important implications for penetrance and  
81 severity of various pathologies including ICH and myopathy. We found that mutations can differ in  
82 degree or kind and that allelic differences contribute to clinical variability, in part, by tissue-specific  
83 mechanistic heterogeneity (Labelle-Dumais et al., 2019). However, variable clinical manifestations  
84 including age of onset and severity among organs have been reported in people with the same recurrent  
85 or inherited mutations, and reduced penetrance and asymptomatic carriers exist in some families,

86 indicating the involvement of factors in addition to allelic heterogeneity (Coupry et al., 2010; de Vries et  
87 al., 2009; Rødahl et al., 2013; Shah et al., 2012).

88  
89 Studies using inbred strains of mice clearly demonstrate that a mutation can have variable outcomes  
90 in different genetic contexts underscoring the important role that genetic modification plays in clinical  
91 heterogeneity. When compared to other mutations in the allelic series, *Col4a1*<sup>Δex41</sup> tends to have the  
92 most severe phenotypes across multiple organs when maintained on a pure C57BL/6J (B6) genetic  
93 background (Gould et al., 2007; Jeanne et al., 2015; Kuo et al., 2014). However, when the *Col4a1*<sup>+/<sup>Δex41</sup></sup>  
94 B6 mice were crossed for a single generation to the CAST/EiJ (CAST) genetic background, ocular  
95 anterior segment dysgenesis (ASD), ICH and skeletal myopathy were all significantly reduced in the  
96 F1 progeny (CASTB6F1) (Gould et al., 2007; Jeanne et al., 2015; Labelle-Dumais et al., 2011).  
97 Interestingly, when *Col4a1*<sup>+/<sup>Δex41</sup></sup> B6 mice were crossed for a single generation to the 129SvEvTac (129)  
98 genetic background, ASD was ameliorated (albeit to a lesser extent than in CASTB6F1 mice) but ICH  
99 was not (Gould et al., 2007; Jeanne et al., 2015). Collectively, these data suggest that the B6 genetic  
100 background confers susceptibility to develop severe Gould syndrome related pathologies and that  
101 CAST and 129 strains have one or more locus/loci that can genetically suppress pathology in a tissue-  
102 specific manner.

103  
104 Identification of genetic modifier genes can help reveal disease mechanisms and potential therapeutic  
105 targets. Phenotype-driven mapping studies using mice and other model organisms are a powerful  
106 approach to identify genetic interactions that may be difficult to discover in humans even when large  
107 pedigrees are available (Ceco and McNally, 2013; Meyer and Anderson, 2017; Vieira et al., 2015). We  
108 previously performed a genetic modifier screen for pathology caused by the *Col4a1*<sup>Δex41</sup> mutation to  
109 provide insight into the underlying pathogenic mechanisms. Because 1) ASD is relatively severe, easily  
110 screened, and robustly suppressed by two strains and 2) the magnitude and breadth of phenotypic  
111 rescue was greater in CAST compared to 129 mice, we selected ASD and CAST as the phenotype and  
112 strain, respectively, to perform a pilot suppressor screen in a small number of mice (Gould et al., 2007).  
113 We generated CASTB6F1 mice and iteratively crossed mutant mice back to the B6 background. In  
114 each backcross, we applied selective pressure to retain one or more genetic suppresser locus by  
115 choosing the progeny with the mildest phenotype to breed for the next generation. Using a crude  
116 genome-wide scan, we identified a dominant modifier locus in CAST Chromosome (Chr) 1 that  
117 suppressed ASD. However, the approach had significant limitations including screening on a single  
118 phenotype, the inability to identify potential recessive loci and the possibility that we may have  
119 incidentally overlooked other dominant loci by imposing bottlenecks at each generation.

120

121 Here, we performed independent genetic modifier screens for ASD and skeletal myopathy on a large  
122 scale F<sub>2</sub> cross with the potential to identify multiple dominant or recessive loci that enhanced or  
123 suppressed pathology. Both screens identified a single suppressor locus on CAST Chr 1 that we called  
124 *modifier of Gould syndrome 1 (MoGS1)*. Surprisingly, although the CAST background also suppressed  
125 ICH, the effect was not attributable to the *MoGS1* locus. These data suggest that ASD and skeletal  
126 myopathy may be mechanistically related to each other but distinct from ICH which further supports the  
127 notion of tissue-specific mechanistic heterogeneity contributing to the clinical variability of Gould  
128 syndrome (Labelle-Dumais et al., 2019). Furthermore, molecular analyses suggest that the ECM  
129 protein fibronectin 1 (FN1) is a strong candidate as the genetic suppressor at the *MoGS1* locus and  
130 provide evidence for a role of altered integrin signaling in Gould syndrome pathogenesis.

131

## 132 RESULTS

133 **High-resolution genome-wide mapping identified a suppressor locus for *Col4a1*-related ASD**  
134 **and myopathy on mouse Chr 1.** To identify modifiers of Gould syndrome, we first performed a  
135 genome-wide screen with the early onset and easily observed ASD phenotype. We phenotyped and  
136 genotyped 192 mutant F<sub>2</sub> progeny from (CAST X B6-*Col4a1*<sup>+/ $\Delta$ ex41</sup>) F<sub>1</sub> intercrosses using a mouse  
137 medium density linkage panel with 646 informative SNPs (Fig. 1A-C). We identified a region of interest  
138 on CAST Chr 1 with a LOD score of 11.2 and Bayesian confidence interval extending from 51.3 to 73.0  
139 Mb (Fig.1C). To determine if smaller effects of other loci might have been masked, we performed a  
140 second genome-wide scan conditioned on this locus, but no additional loci reached statistical  
141 significance (Fig. 1D). This observation suggests that the major modifying effect of the CAST  
142 background on ASD is imparted through this single dominant locus on Chr 1.

143

144 In addition to suppressing ASD, the CAST genetic background significantly suppresses skeletal  
145 myopathy in *Col4a1* mutant mice (Labelle-Dumais et al., 2011). To identify potential modifier loci for  
146 this phenotype, we performed an independent genome-wide mapping analysis using skeletal myopathy  
147 as the primary phenotype. We quantified myopathy severity as the percentage of muscle fibers  
148 containing non-peripheral nuclei (NPN) in histological sections of quadriceps (Fig. 1E). This assay is  
149 more quantitative with greater statistical power but also more labor-intensive and therefore we analyzed  
150 a randomly generated subset (n= 49) of the mutant (CAST X B6-*Col4a1*<sup>+/ $\Delta$ ex41</sup>) F<sub>2</sub> progeny. The  
151 genome-wide scan revealed an interval on Chr 1 defined by the same markers as the ASD modifier  
152 locus (max LOD score = 5.61) (Fig. 1F).

153

To validate the biological effect of the *MoGS1* locus, we independently generated an incipient congenic strain by iterative backcrossing the CAST-derived locus onto the susceptible B6 genetic background for 5 generations (N5). At N5, the genetic background of the mice is ~97% pure B6 on average, except that they carry the CAST Chr 1 interval that includes the *MoGS1* locus. Incipient congenic mice were intercrossed to generate *Col4a1<sup>+Δex41</sup>* mice with zero (B/B), one (C/B) or two (C/C) copies of the CAST-derived chromosomal interval (Fig. 2). Out of 24 eyes from *Col4a1<sup>+Δex41</sup>* mice that were homozygous for the B6 allele (*MoGS1<sup>B/B</sup>*) at the congenic interval, 29% (7) were moderate, and 71% (17) were severe (Fig. 2A). In contrast, out of 28 eyes from the heterozygous group (*MoGS1<sup>C/B</sup>*) there were 21.5% (6), 46.5% (13) and 32% (9) of eyes that were scored with mild, moderate and severe ASD, respectively. In mice homozygous for the CAST allele (*MoGS1<sup>C/C</sup>*), there were 50% (10), 35% (7) and 15% (3) of eyes that were mild, moderate and severe, respectively. In a parallel experiment, we tested the effect of this congenic locus on myopathy and observed a dosage effect, whereby *Col4a1<sup>+Δex41</sup>* mice that were heterozygous at the *MoGS1* locus (*MoGS1<sup>C/B</sup>*) showed a trend toward reduced myopathy while homozygous *MoGS1<sup>C/C</sup>* incipient congenic mice had significantly milder myopathy compared to mice that were homozygous for the B6 allele (*MoGS1<sup>B/B</sup>*). Together, these results support the existence of one or more semi-dominant modifier genes at the *MoGS1* locus on Chr 1.

### ***MoGS1* does not reduce porencephaly penetrance or ICH severity in *Col4a1* mutant mice**

Individuals with Gould syndrome have highly penetrant and clinically variable cerebrovascular diseases that include porencephaly and ICH (Bilguvar et al., 2009; de Vries et al., 2009; Giorgio et al., 2015; Vilain et al., 2002). ICH was previously reported to be significantly reduced in *Col4a1* mutant mice on a CASTB6F1 background compared to those maintained on a B6 background suggesting that the CAST genetic background also suppresses this phenotype (Jeanne et al., 2015). To test whether the *MoGS1* locus might also genetically modify cerebrovascular diseases, we assessed porencephaly penetrance and ICH severity of the incipient congenic mice. We found that porencephaly penetrance and ICH severity were similar among *Col4a1<sup>+Δex41</sup>* mice irrespective of their genotypes at the *MoGS1* locus (Fig. 2C, D).

### **Fine mapping with subcongenic lines refined *MoGS1* to a 4.3 Mb interval**

To refine the interval of interest at the *MoGS1* locus, we generated subcongenic lines of the CAST derived chromosomal fragments on a B6 background (N5) and tested which line suppresses ASD and skeletal myopathy in *Col4a1<sup>+Δex41</sup>* mice (Fig. 3A). Line 1 which included an interval of ~10 Mb from the CAST genome did not have a modifying effect on either phenotype (Fig. S1). In contrast, a subcongenic line (line 2) containing the distal portion of the *MoGS1* locus (from 68.7 – 73.0 Mb) showed a significant

188 protective effect for both ASD (Fig. 3B) and myopathy (Fig. 3C). While approximately 87% of eyes from  
189 *Col4a1*<sup>+/ $\Delta$ ex41</sup>;*MoGS1*<sup>B/B</sup> mice had severe ASD (1 mild, 4 moderate and 33 severe), only ~35% of the  
190 eyes from *Col4a1*<sup>+/ $\Delta$ ex41</sup>;*MoGS1*<sup>C/C</sup> mice were severe (8 mild, 14 moderate, and 12 severe). Likewise,  
191 *Col4a1*<sup>+/ $\Delta$ ex41</sup>;*MoGS1*<sup>C/C</sup> mice had significantly fewer NPN compared to *Col4a1*<sup>+/ $\Delta$ ex41</sup>;*MoGS1*<sup>B/B</sup> mice.  
192 Heterozygosity for this distal interval had intermediate effects for both phenotypes.  
193

## 194 Candidate gene analysis

195 The refined *MoGS1* locus is 4.3 Mb, and contains 18 protein-coding genes, and 38 predicted non-  
196 protein coding genes including 13 lncRNAs, 6 snRNA genes, pseudogenes, and others (Table S1).  
197 Using publicly available databases (Keane et al., 2011), we examined the refined *MoGS1* interval for  
198 sequence differences between the B6 and CAST genomes. Among all variations, there were 7,430  
199 single nucleotide polymorphisms (SNPs), 667 small insertions and deletions (indels) and 17 large  
200 structural variations including large insertions or deletions. Thirty-five SNPs were predicted to be  
201 missense variants affecting 10 protein-coding genes (Table 1). Among those genes, *Ankar* had three  
202 missense variants predicted to be deleterious by SIFT (Vaser et al., 2016) and *Spag16* had one  
203 predicted stop-gain variant; however, neither gene is an obvious functional candidate. Based on the  
204 Gene Expression Database (GXD) from Mouse Genome Informatics ([informatics.jax.org/expression](http://informatics.jax.org/expression)),  
205 13 of the 18 protein coding genes have been shown to be expressed both in eyes and skeletal muscles.  
206 Two genes, *Vwc2l* and *Bard1*, are only expressed in eye and three genes, *Ankar*, *Spag16*, and *Abca12*,  
207 have no reported expression in either tissue. Since both ocular and muscular defects in *Col4a1*<sup>+/ $\Delta$ ex41</sup>  
208 mice were suppressed by the *MoGS1* locus, we hypothesized that the underlying pathogenic  
209 mechanism(s) may be shared between these two tissues. Therefore, despite the presence of possible  
210 pathogenic variants, we excluded *Ankar*, *Spag16*, *Abca12*, *Vwc2l* and *Bard1* from further analysis.  
211

212 Next, we tested whether any of the 13 genes with reported expression in ocular and muscular tissues  
213 are differentially expressed in B6 mice with or without the CAST interval at the *MoGS1* locus. Four  
214 genes, *Mreg*, *Fn1*, *Pecr1*, and *Igbbp2*, showed significantly increased expression in *MoGS1*<sup>C/C</sup> eyes at  
215 postnatal day 0 (P0) compared to *MoGS1*<sup>B/B</sup> eyes by qPCR (Table 1 and Fig. 4A). FN1 is an  
216 extracellular matrix protein with multiple important roles in development and tissue homeostasis by  
217 interacting with cell surface receptors, extracellular matrix proteins and growth factors (Zollinger and  
218 Smith, 2017). Notably, FN1 has binding sites for type IV collagen (Laurie et al., 1986; Laurie et al., 1982)  
219 and localizes adjacent to basement membranes in many tissues (Laurie et al., 1982). Moreover, like  
220 collagens, FN1 interacts with cells via integrin receptors (Johansson et al., 1997; Vandenberg et al.,  
221 1991), making it a strong functional candidate as a genetic modifier of COL4A1-related pathology.



222

## 223 **Functional testing of FN1 and integrin signaling in MoGS1 mice**

224 In silico analysis comparing the CAST and B6 alleles of *Fn1* revealed 3 missense SNPs, 1 splice region  
225 SNP, 7 SNPs in the UTR, 238 other noncoding SNPs, and 2 structural variations (Table S2). Murine  
226 FN1 has 12 isoforms (White et al., 2008), making it difficult to predict the functional consequence(s) of  
227 a particular variant. The primary consequence of *Col4a1* mutations is impaired secretion of mutant  
228  $\alpha1\alpha1\alpha2$  heterotrimers into the basement membranes (Kuo et al., 2014) and it is possible that increased  
229 FN1 confers partial compensation for extracellular  $\alpha1\alpha1\alpha2$  deficiency. Consistent with this hypothesis,  
230 we observed increased *Fn1* expression in developing eyes from *MoGS1<sup>C/C</sup>* mice compared to  
231 *MoGS1<sup>B/B</sup>* mice (Fig. 4A). Furthermore, we found that FN1 levels were higher in P10 quadriceps from  
232 *Col4a1<sup>+/ $\Delta$ ex41</sup>* compared to *Col4a1<sup>+/+</sup>* mice and in *MoGS1<sup>C/C</sup>* compared to *MoGS1<sup>B/B</sup>* mice (Fig. 4B, C).  
233 FN1 plays important roles in cell adhesion, migration and signaling during tissue morphogenesis, which  
234 is primarily mediated through its interaction with integrins (Miyamoto et al., 1998; Sakai et al., 2003).  
235 Therefore, we tested the effect of *MoGS1* on integrin signaling by evaluating the protein levels and  
236 phosphorylation status of two downstream effectors, integrin linked kinase (ILK) and focal adhesion  
237 kinase (FAK) (Hu and Luo, 2013; Humphries et al., 2019) (Fig. 4B, C). Western blot analysis of P10  
238 quadriceps revealed that ILK levels were higher in *Col4a1<sup>+/ $\Delta$ ex41</sup>* mice irrespective of whether they  
239 carried the *MoGS1<sup>B/B</sup>* or *MoGS1<sup>C/C</sup>* interval. Similarly, FAK phosphorylation (pFAK) and pFAK/FAK ratio  
240 were significantly higher in *Col4a1<sup>+/ $\Delta$ ex41</sup>;*MoGS1<sup>B/B</sup>* compared to *Col4a1<sup>+/+</sup>;*MoGS1<sup>B/B</sup>* mice, and were  
241 reduced by the *MoGS1<sup>C/C</sup>* interval. No difference was detected for the broadly used beta subunit of the  
242 integrin receptor, ITGB1, between genotypes. Taken together, these data suggest that elevated integrin  
243 signaling may contribute to Gould syndrome and that ASD and myopathy may be partially rescued by  
244 compensatory *Fn1* expression.**

245

## 246 **DISCUSSION**

247 Here, we performed a genetic modifier screen in *Col4a1* mutant mice to gain insight into the pathogenic  
248 mechanisms that contribute to Gould syndrome. To this end, we used a large-scale F2 cross of  
249 CASTxB6 and conducted independent screens for ASD and skeletal myopathy – two phenotypes that  
250 are commonly observed in individuals with Gould syndrome. Independent analyses for both phenotypes  
251 revealed a single, shared, semi-dominant locus on CAST Chr 1 that corroborates a previously identified  
252 locus (Gould et al., 2007). To validate this genetic data, we iteratively backcrossed the locus onto the  
253 B6 background and showed that a refined interval, referred to as *MoGS1*, suppressed ASD and  
254 myopathy in *Col4a1* mutant mice. However, the *MoGS1* locus had no effect on porencephaly  
255 penetrance and ICH severity – two phenotypes associated with Gould syndrome and previously

256 characterized in *Col4a1* mutant mice. The failure of *MoGS1* to suppress ICH severity was unexpected  
257 since the CASTB6F1 genetic context significantly suppresses this phenotype. These data suggest that  
258 the effect of the *MoGS1* locus is tissue-specific and that other modifiers of ICH exist in the CAST  
259 background.

260  
261 Using subcongenic strains we refined the minimum critical interval for the suppressor locus to a 4.3 Mb  
262 region containing 18 protein-coding genes. Of the 18 positional candidate genes, 13 are expressed  
263 both in eyes and muscles, of which 6 contained missense variants between the CAST and B6 genomes;  
264 however, none were predicted to be deleterious. Mutations in one of these six genes, *Smarcal1*, causes  
265 a rare multisystem disorder (Schimke Immunoosseous dysplasia; OMIM# 242900) characterized by  
266 spondyloepiphyseal dysplasia, nephrotic syndrome, T cell immunodeficiency, and a portion of patients  
267 develop corneal opacity, myopia, astigmatism and optic atrophy (Boerkoel et al., 2000). SMARCAL1  
268 (SWI/SNF related matrix associated, actin dependent regulator of chromatin, subfamily a-like 1) is  
269 chromatin remodeling protein involved in transcriptional regulation and DNA replication, repair and  
270 recombination (Bansbach et al., 2010). Compared to the B6 reference genome, CAST has two  
271 missense variations in *Smarcal1* that were predicted to be tolerated, and no change of expression was  
272 detected in P0 eyes. Of the four positional candidate genes that were differentially expressed, *Fn1* is a  
273 strong functional candidate. FN1 is a ubiquitously expressed extracellular glycoprotein which plays  
274 important roles in multiple processes by interacting with cell surface receptors, growth factors and other  
275 extracellular matrix proteins. In cell culture, FN1 promotes collagen IV deposition, assembly and  
276 incorporation into the extracellular matrix (Filla et al., 2017; Ngandu Mpoyi et al., 2020). Mice deficient  
277 for *Fn1* have aberrant lens placode formation and develop microphthalmia and cataracts (Hayes et al.,  
278 2012; Huang et al., 2011). Moreover, lack of FN1 in the skeletal muscle stem cell niche impairs muscle  
279 regeneration in aged mice (Lukjanenko et al., 2016). Collectively, these findings support our genetic  
280 and molecular evidence suggesting that that FN1 is a strong candidate as the gene responsible for the  
281 effects conferred by the *MoGS1* locus.

282  
283 In general, the presence of mutant COL4A1 or COL4A2 leads to intracellular accumulation of mutant  
284 heterotrimers at the expense of their secretion. Intracellular heterotrimer accumulation represents a  
285 potential cell autonomous (proximal) insult (Jeanne and Gould, 2017; Mao et al., 2015). Impaired  
286 heterotrimer secretion can also lead to a cell non-autonomous (distal) insult caused by extracellular  
287 heterotrimer deficiency which can simultaneously perturb any number of presently unidentified cellular  
288 pathways. Intracellular accumulation and extracellular deficiency can be addressed simultaneously by  
289 targeting the proximal defect of protein misfolding. For example, pharmacologically promoting

heterotrimer secretion using a chemical chaperone, 4-phenylbutyrate (4PBA), alleviates diverse pathologies in *Col4a1* mutant mice (Hayashi et al., 2018; Jeanne et al., 2015; Jones et al., 2019; Labelle-Dumais et al., 2019). However, even in the absence of 4PBA, secretion of mutant heterotrimers is not completely abolished and the presence of mutant heterotrimers in the basement membrane represents a third and distinct class of insult. We demonstrated this proof of concept by showing that mice with a *Col4a1*<sup>G394V</sup> mutation have disproportionately severe myopathy, which is exacerbated when they are treated with 4PBA (Labelle-Dumais et al., 2019). The affected residue, glycine 394, is adjacent to a putative integrin-binding domain (Parkin et al., 2011) implicating impaired integrin binding in skeletal myopathy. Thus, for mutations that impair subdomains of the heterotrimer responsible for executing specific extracellular functions, promoting secretion of mutant heterotrimers would still be predicted to ameliorate many extracellular functions. However, the increased levels of mutant heterotrimers in basement membranes may also exacerbate specific disease pathway(s) related to the function(s) of the impacted subdomain (Labelle-Dumais et al., 2019). Identifying the multitude of extracellular roles of COL4A1/A2 and how they are executed will be key in understanding fundamental aspects of matrix biology and the tissue-specific pathogenic mechanisms in Gould syndrome. Mapping functional subdomains on the  $\alpha1\alpha1\alpha2$  heterotrimers will be important for genetically stratifying patients and may influence the prognosis and potential therapeutic approaches.

The unbiased nature of genetic screens leaves open the possibility for finding modifiers of either proximal or distal insults. By independently analyzing two phenotypes using an inbred strain (CAST) with broad phenotypic suppression, we sought to find modifiers that might represent therapeutic targets for the breadth of Gould Syndrome phenotypes. *MoGS1*, the only significant locus that we identified, conferred tissue-specific effects by suppressing ASD and myopathy but not ICH. This observation is consistent with a modifier that has an extracellular function and suggests that the two phenotypes have at least partially overlapping distal pathogenic mechanisms. In a previous study using the *Col4a1* <sup>$\Delta$ ex41</sup> mutation we found that, compared to B6, the CASTB6F1 background appeared to reduce intracellular accumulation but did not increase extracellular COL4A1 levels (Jeanne et al., 2015). This observation implicated intracellular accumulation in pathogenesis but did not rule out the potential of compensation by other extracellular factors. The fact that *MoGS1* does not suppress ICH severity indicates that intracellular accumulation of mutant proteins may indeed be the primary pathogenic insult for that phenotype.

When we compared disease severity across a murine allelic series of 9 *Col4a1* and *Col4a2* mutations, we found that the *Col4a1*<sup>G394V</sup> mutation had relatively little intracellular accumulation and that

*Col4a1*<sup>+/*G394V*</sup> mice had mild ICH but severe ASD and myopathy (Kuo et al., 2014). The proximity of the *Col4a1*<sup>*G394V*</sup> mutation to a predicted integrin binding domain suggests that impaired integrin binding contributes to ocular dysgenesis and myopathy. Therefore, one possibility is that FN1 ameliorates ASD and skeletal myopathy caused by *Col4a1* mutations through compensatory integrin-mediated interactions. Consistent with this hypothesis, we detected evidence for increased integrin signaling in *Col4a1*<sup>+/*Δex41*</sup> mice that was reduced by the *MoGS1* locus from CAST in the context of increased *Fn1* expression. Moreover, ILK and FAK are both previously implicated in lens development (Cammass et al., 2012; Harburger and Calderwood, 2009; Hayes et al., 2012; Samuelsson et al., 2007; Teo et al., 2014) and myopathy (Boppart and Mahmassani, 2019; Gheyara et al., 2007). Functional validation of this pathway with experimental manipulation and preclinical interventions would represent a significant advance in the understanding of the pathogenic mechanisms that contribute to Gould syndrome.

## MATERIALS AND METHODS

### Mice

All experiments were compliant with the ARVO Statement for the Use of Animals in Ophthalmic and Vision Research and approved by the Institutional Animal Care and Use Committee at the University of California, San Francisco. *Col4a1*<sup>+/*Δex41*</sup> mice were originally identified in a mutagenesis screen conducted at The Jackson Laboratory (Bar Harbor, ME) (Gould et al., 2007; Gould et al., 2005). Since then *Col4a1*<sup>+/*Δex41*</sup> mice has been backcrossed to B6 for at least 20 generations. CAST mice were obtained from The Jackson Laboratory. All animals were maintained in full-barrier facilities free of specific pathogens on a 12-hour light/dark cycle with food and water ad libitum. Both male and female mice were used in this study.

### Slit lamp biomicroscopy

Ocular anterior segment examinations were performed on mice at 1.0- 1.5 months of age using a slit lamp biomicroscope (Topcon SL-D7; Topcon Medical Systems, Oakland, NJ) attached to a digital SLR camera (Nikon D200; Nikon, Melville, NY).

### Muscle analysis

At 2 months of age, mice were subjected to treadmill exercise and their quadriceps were harvested two days later. Exercise was 30 minutes with a 15° downhill grade on a treadmill equipped with a shock plate (Columbus Instruments, Columbus, OH). Animals were started at 6 m/min and increased by 3 m/min every 2 min until maximum of 15 m/min speed was reached. Quadriceps were dissected and frozen in liquid nitrogen cooled isopentane. Cryosections (10 μm) were collected at regular intervals

358 and stained with hematoxylin and eosin (H&E) for histopathology and the number of NPN were  
359 evaluated on a total of 12 sections for each muscle and the percentage of muscle fibers with NPN was  
360 quantified. The observers were masked to genotypes and counted between 2000–5000 muscle fibers  
361 per animal.

### 363 **Brain histological analysis**

364 ICH was assessed at 2 months of age by Perl's Prussian blue staining as previously described (Jeanne  
365 et al., 2015). Briefly, mice underwent transcardial perfusion with saline followed by 4%  
366 paraformaldehyde (PFA) and then posted fixed in 4% PFA overnight. Brains were dissected,  
367 cryoprotected in 30% sucrose and embedded in optimal cutting temperature compound (Sakura  
368 Finetek, Torrance, CA). Coronal cryo-sections (35  $\mu$ m) regularly spaced along the rostro-caudal axis  
369 were stained with Prussian blue/Fast red and imaged. On each section, the percentage of brain area  
370 with Prussian blue staining was calculated using ImageJ software (National Institutes of Health). ICH  
371 severity was expressed as the average percentage of hemosiderin surface area on 28 sections for  
372 each brain. The presence or absence of porencephaly on sections used in ICH analysis was also  
373 recorded.

### 375 **Genome scan**

376 Genomic DNA was obtained from 192 (CAST X B6) F<sub>2</sub> mice carrying the *Col4a1*<sup>+/ $\Delta$ ex41</sup> mutation and  
377 genotyped at the UCSF Genomic Core Facility with a commercial single nucleotide polymorphism (SNP)  
378 panel (Illumina, San Diego, CA) which contains 646 informative SNPs for (CAST X B6) F<sub>2</sub> progeny. A  
379 genome-wide suppressor screen was performed in R (R Core Team, 2019) using the package R/qtl  
380 (Broman et al., 2003) treating the trait as binary. Genome-wide significance was established using 1000  
381 permutation testing (Churchill and Doerge, 1994). A confidence interval for each QTL location was then  
382 calculated using Bayesian confidence sets (Sen and Churchill, 2001). The ASD score for each animal  
383 was averaged from both eyes and treated as a dichotomous variable where score of 1 was mild, and  
384 score of 1.5 -3 was severe. A subset (49) of these 192 mice was randomly selected in a separate  
385 mapping analysis for the muscle modifier as a quantitative trait.

### 387 **Quantitative polymerase chain reaction (qPCR)**

388 Eyes from P0 mice were dissected in PBS, immediately transferred in RNA<sup>later</sup> (ThermoFisher  
389 Scientific, USA) and stored at -80°C until use. Total RNA was extracted using TRIzol Reagent  
390 (ThermoFisher Scientific) according to the manufacturer's instructions and reverse transcribed to cDNA

391 using iScript cDNA synthesis kit (Bio-Rad, Hercules, CA). Quantitative PCR was performed on a Bio-  
392 Rad CFX96 real-time system using SsoFast Evagreen mix (Bio-Rad) and primers are listed in Table  
393 S3. Briefly, 10 ng of cDNA and 1.25  $\mu$ M primers were used per reaction in a final volume of 10  $\mu$ l. Each  
394 cycle consisted of denaturation at 95°C for 5s, followed by annealing and extension at 60°C for 5s for  
395 a total of 45 cycles. All experiments were run with technical duplicates and 4-6 biological replicates  
396 were used per group. The relative expression of each gene was normalized to *Hprt1* or *Gapdh* and  
397 analyzed using the  $2^{-\Delta\Delta CT}$  method (Livak and Schmittgen, 2001).

### 398 399 **Western blot analyses**

400 Quadriceps from P10 pups were dissected and total proteins extracted using radioimmunoprecipitation  
401 assay (RIPA) buffer (VWR, Radnor, PA) supplemented with Halt Protease and Phosphatase Inhibitor  
402 Cocktail (ThermoFisher Scientific), EDTA and 2 mM phenylmethylsulfonyl fluoride. Total proteins (10  
403  $\mu$ g) were separated on 4–15% gradient SDS-PAGE gels (Bio-Rad) and transferred to polyvinylidene  
404 fluoride (PVDF) membranes (BioRad). Membranes were blocked for 1 hr at room temperature in 5%  
405 non-fat milk in TBS containing 0.1% Tween-20 (TBST), incubated overnight at 4°C in primary antibodies  
406 diluted in 2% non-fat milk in TBST. Primary antibodies and dilutions used are as follow: rabbit anti-FN1  
407 (Abcam #Ab2413 1:10000, Abcam), rabbit anti-pFAK (1:1000, Invitrogen #44624G), rabbit anti-FAK  
408 (1:1000, Santa Cruz #SC-557), rabbit anti-ILK (1:1000, Cell Signaling Technology #3862), mouse anti-  
409 ITGB1 (1:1000, BD Biosciences #610467), and mouse anti-GAPDH (1:500000, Millipore #MAB374).  
410 Following washes in TBST, membranes were incubated for 1 hr at room temperature with species-  
411 specific horseradish peroxidase conjugated secondary antibodies (1:10000, Jackson ImmunoResearch,  
412 West Grove, PA) diluted in 2% non-fat milk in TBST. Immunoreactivity was visualized using  
413 chemiluminescence (ECL or Luminata Forte substrate, ThermoFisher Scientific) and imaged using a  
414 ChemiDoc MP Imaging System (Bio-Rad) or exposed to X-ray films. Densitometric analyses were  
415 performed on low exposure images using the Quantity One software (Bio-Rad).

### 416 417 **Statistics**

418 Statistical analyses and graphs were prepared using GraphPad Prism v8.0 Software (GraphPad, La  
419 Jolla, CA). Multiple comparisons were carried using one-way ANOVA followed by Tukey post-test or  
420 Kruskal-Wallis test followed by Dunn's post-test. *p* values less than 0.05 were considered statistically  
421 significant.

### 422 423 **ACKNOWLEDGEMENTS**

424 We thank members of the Gould Laboratory for their critical reviews of the manuscript. We also thank  
425 Cassandre Labelle-Dumais for helpful discussion and guidance with the muscle studies.

#### 427 **COMPETING INTERESTS**

428 M.J. is an employee of Genentech, Inc., a member of the Roche group. K.H. is an employee of  
429 Centrillion Technologies.

#### 431 **FUNDING**

432 This work was supported by NIH grants R01EY019887 (DBG), R01NS096173 (DBG), Research to  
433 Prevent Blindness (DBG), That Man May See (MM and DBG), and Knights Templar Eye Foundation  
434 (MM) and Bright Focus (DBG). This research was supported, in part, by the UCSF Vision Core shared  
435 resource of the NIH/NEI P30 EY002162, and by an unrestricted grant from Research to Prevent  
436 Blindness, New York, NY.

#### 438 **AUTHOR CONTRIBUTIONS**

439 Conceived and designed the experiments: D.B.G and M.M. Performed experiments: M.M, T.P, M.J,  
440 and K.H. Data analysis: M.M, T.P, M.J, K.H, S.S and D.B.G. Contributed reagents, materials, and/or  
441 analysis tools: S.S. Writing of the manuscript: M.M and D.B.G.

442

Table 1. List of protein-coding genes in the refined *MoGS* locus

443

| Gene name       | Entrez gene ID | # of missense SNPs | # of deleterious SNPs | # of stop-gain SNPs | # of SNPs in splice region | # of SNPs in 3'UTR | Eye expression | Muscle expression | Relative mRNA expression | <i>p</i> - value |
|-----------------|----------------|--------------------|-----------------------|---------------------|----------------------------|--------------------|----------------|-------------------|--------------------------|------------------|
| <i>ErbB4</i>    | 13869          | 0                  | 0                     | 0                   | 0                          | 0                  | Yes (> E18)    | Yes (< E18)       | 0.88                     | 0.559            |
| <i>Ikzf2</i>    | 22779          | 2                  | 0                     | 0                   | 0                          | 40                 | Yes (> P4)     | Yes (> P4)        | 0.79                     | 0.054            |
| <i>Spag16</i>   | 66722          | 8                  | 0                     | 1                   | 5                          | 39                 | -              | -                 | NA                       | NA               |
| <i>Vwc2l</i>    | 320460         | 0                  | 0                     | 0                   | 0                          | 21                 | Yes (> P4)     | -                 | NA                       | NA               |
| <i>Bard1</i>    | 12021          | 3                  | 0                     | 0                   | 0                          | 29                 | Yes (> P4)     | -                 | NA                       | NA               |
| <i>Abca12</i>   | 74591          | 5                  | 0                     | 0                   | 4                          | 4                  | -              | -                 | NA                       | NA               |
| <i>Atic</i>     | 108147         | 3                  | 0                     | 0                   | 2                          | 17                 | Yes (> E15)    | Yes (> P4)        | 0.82                     | 0.267            |
| <i>Fn1</i>      | 14268          | 3                  | 0                     | 0                   | 10                         | 5                  | Yes (> E8)     | Yes (> E13)       | 1.45                     | 0.007**          |
| <i>Mreg</i>     | 381269         | 0                  | 0                     | 0                   | 0                          | 16                 | Yes (> P4)     | Yes (> P4)        | 1.43                     | 0.026*           |
| <i>Pecr</i>     | 111175         | 0                  | 0                     | 0                   | 1                          | 8                  | Yes (> P4)     | Yes (> P4)        | 0.80                     | 0.026*           |
| <i>Tmem169</i>  | 271711         | 1                  | 0                     | 0                   | 1                          | 7                  | Yes (> P4)     | Yes (> P4)        | 0.97                     | 0.724            |
| <i>Xrcc5</i>    | 22596          | 3                  | 0                     | 0                   | 5                          | 5                  | Yes (> P4)     | Yes (> P4)        | 0.88                     | 0.496            |
| <i>March4</i>   | 381270         | 0                  | 0                     | 0                   | 0                          | 13                 | Yes (> P4)     | Yes (> P4)        | 1.20                     | 0.452            |
| <i>Smarcal1</i> | 54380          | 2                  | 0                     | 0                   | 0                          | 0                  | Yes (> P4)     | Yes (> P4)        | 0.95                     | 0.459            |
| <i>Ankar</i>    | 319695         | 5                  | 3                     | 0                   | 0                          | 0                  | -              | -                 | NA                       | NA               |
| <i>Rpl37a</i>   | 19981          | 0                  | 0                     | 0                   | 2                          | 1                  | Yes (> P4)     | Yes (> P4)        | 1.07                     | 0.192            |
| <i>Igfbp2</i>   | 16008          | 0                  | 0                     | 0                   | 0                          | 1                  | Yes (> E13)    | Yes (> P4)        | 0.83                     | 0.023*           |
| <i>Igfbp5</i>   | 16011          | 0                  | 0                     | 0                   | 0                          | 36                 | Yes (> E13)    | Yes (> E15)       | 1.34                     | 0.076            |

444

E, embryonic day; P, postnatal; -, expression not detectable; NA, data not available; \*  $p < 0.05$ ; \*\*  $p < 0.01$  by Student's t-test

445

446



## REFERENCES

- Bansbach, C. E., Boerkoel, C. F. and Cortez, D. (2010). SMARCAL1 and replication stress: an explanation for SIOD? *Nucleus* **1**, 245-8.
- Bilguvar, K., DiLuna, M. L., Bizzarro, M. J., Bayri, Y., Schneider, K. C., Lifton, R. P., Gunel, M. and Ment, L. R. (2009). COL4A1 mutation in preterm intraventricular hemorrhage. *J Pediatr* **155**, 743-5.
- Boerkoel, C. F., O'Neill, S., André, J. L., Benke, P. J., Bogdanović, R., Bulla, M., Burguet, A., Cockfield, S., Cordeiro, I., Ehrich, J. H. et al. (2000). Manifestations and treatment of Schimke immuno-osseous dysplasia: 14 new cases and a review of the literature. *Eur J Pediatr* **159**, 1-7.
- Boppert, M. D. and Mahmassani, Z. S. (2019). Integrin signaling: linking mechanical stimulation to skeletal muscle hypertrophy. *Am J Physiol Cell Physiol* **317**, C629-C641.
- Breedveld, G., de Coo, I. F., Lequin, M. H., Arts, W. F., Heutink, P., Gould, D. B., John, S. W., Oostra, B. and Mancini, G. M. (2006). Novel mutations in three families confirm a major role of COL4A1 in hereditary porencephaly. *J Med Genet* **43**, 490-5.
- Broman, K. W., Wu, H., Sen, S. and Churchill, G. A. (2003). R/qtl: QTL mapping in experimental crosses. *Bioinformatics* **19**, 889-90.
- Cammas, L., Wolfe, J., Choi, S. Y., Dedhar, S. and Beggs, H. E. (2012). Integrin-linked kinase deletion in the developing lens leads to capsule rupture, impaired fiber migration and non-apoptotic epithelial cell death. *Invest Ophthalmol Vis Sci* **53**, 3067-81.
- Ceco, E. and McNally, E. M. (2013). Modifying muscular dystrophy through transforming growth factor- $\beta$ . *FEBS J* **280**, 4198-209.
- Churchill, G. A. and Doerge, R. W. (1994). Empirical threshold values for quantitative trait mapping. *Genetics* **138**, 963-71.
- Coupry, I., Sibon, I., Mortemousque, B., Rouanet, F., Mine, M. and Goizet, C. (2010). Ophthalmological features associated with COL4A1 mutations. *Arch Ophthalmol* **128**, 483-9.
- de Vries, L. S., Koopman, C., Groenendaal, F., Van Schooneveld, M., Verheijen, F. W., Verbeek, E., Witkamp, T. D., van der Worp, H. B. and Mancini, G. (2009). COL4A1 mutation in two preterm siblings with antenatal onset of parenchymal hemorrhage. *Ann Neurol* **65**, 12-8.
- Favor, J., Gloeckner, C. J., Janik, D., Klempt, M., Neuhauser-Klaus, A., Pretsch, W., Schmahl, W. and Quintanilla-Fend, L. (2007). Type IV procollagen missense mutations associated with defects of the eye, vascular stability, the brain, kidney function and embryonic or postnatal viability in the mouse, *Mus musculus*: an extension of the Col4a1 allelic series and the identification of the first two Col4a2 mutant alleles. *Genetics* **175**, 725-36.
- Fidler, A. L., Darris, C. E., Chetyrkin, S. V., Pedchenko, V. K., Boudko, S. P., Brown, K. L., Gray Jerome, W., Hudson, J. K., Rokas, A. and Hudson, B. G. (2017). Collagen IV and basement membrane at the evolutionary dawn of metazoan tissues. *Elife* **6**.
- Filla, M. S., Dimeo, K. D., Tong, T. and Peters, D. M. (2017). Disruption of fibronectin matrix affects type IV collagen, fibrillin and laminin deposition into extracellular matrix of human trabecular meshwork (HTM) cells. *Exp Eye Res* **165**, 7-19.
- Gheyara, A. L., Vallejo-Illarramendi, A., Zang, K., Mei, L., St-Arnaud, R., Dedhar, S. and Reichardt, L. F. (2007). Deletion of integrin-linked kinase from skeletal muscles of mice resembles muscular dystrophy due to alpha 7 beta 1-integrin deficiency. *Am J Pathol* **171**, 1966-77.
- Giorgio, E., Vaula, G., Bosco, G., Giaccone, S., Mancini, C., Calcia, A., Cavalieri, S., Di Gregorio, E., Rigault De Longrais, R., Leombruni, S. et al. (2015). Two families with novel missense mutations in COL4A1: When diagnosis can be missed. *J Neurol Sci* **352**, 99-104.
- Gould, D. B., Marchant, J. K., Savinova, O. V., Smith, R. S. and John, S. W. (2007). Col4a1 mutation causes endoplasmic reticulum stress and genetically modifiable ocular dysgenesis. *Hum Mol Genet* **16**, 798-807.

- 495 **Gould, D. B., Phalan, F. C., Breedveld, G. J., van Mil, S. E., Smith, R. S., Schimenti, J. C.,**  
496 **Aguglia, U., van der Knaap, M. S., Heutink, P. and John, S. W.** (2005). Mutations in Col4a1 cause  
497 perinatal cerebral hemorrhage and porencephaly. *Science* **308**, 1167-71.
- 498 **Gould, D. B., Phalan, F. C., van Mil, S. E., Sundberg, J. P., Vahedi, K., Massin, P.,**  
499 **Bousser, M. G., Heutink, P., Miner, J. H., Tournier-Lasserre, E. et al.** (2006). Role of COL4A1 in  
500 small-vessel disease and hemorrhagic stroke. *N Engl J Med* **354**, 1489-96.
- 501 **Harburger, D. S. and Calderwood, D. A.** (2009). Integrin signalling at a glance. *J Cell Sci*  
502 **122**, 159-63.
- 503 **Hayashi, G., Labelle-Dumais, C. and Gould, D. B.** (2018). Use of sodium 4-phenylbutyrate to  
504 define therapeutic parameters for reducing intracerebral hemorrhage and myopathy in Col4a1 mutant  
505 mice. *Dis Model Mech* **11**.
- 506 **Hayes, J. M., Hartsock, A., Clark, B. S., Napier, H. R., Link, B. A. and Gross, J. M.** (2012).  
507 Integrin alpha5/fibronectin1 and focal adhesion kinase are required for lens fiber morphogenesis in  
508 zebrafish. *Mol Biol Cell* **23**, 4725-38.
- 509 **Hu, P. and Luo, B. H.** (2013). Integrin bi-directional signaling across the plasma membrane. *J*  
510 *Cell Physiol* **228**, 306-12.
- 511 **Huang, J., Rajagopal, R., Liu, Y., Dattilo, L. K., Shaham, O., Ashery-Padan, R. and Beebe,**  
512 **D. C.** (2011). The mechanism of lens placode formation: a case of matrix-mediated morphogenesis.  
513 *Dev Biol* **355**, 32-42.
- 514 **Humphries, J. D., Chastney, M. R., Askari, J. A. and Humphries, M. J.** (2019). Signal  
515 transduction via integrin adhesion complexes. *Curr Opin Cell Biol* **56**, 14-21.
- 516 **Jeanne, M. and Gould, D. B.** (2017). Genotype-phenotype correlations in pathology caused  
517 by collagen type IV alpha 1 and 2 mutations. *Matrix Biol* **57-58**, 29-44.
- 518 **Jeanne, M., Jorgensen, J. and Gould, D. B.** (2015). Molecular and Genetic Analyses of  
519 Collagen Type IV Mutant Mouse Models of Spontaneous Intracerebral Hemorrhage Identify  
520 Mechanisms for Stroke Prevention. *Circulation* **131**, 1555-65.
- 521 **Johansson, S., Svineng, G., Wennerberg, K., Armulik, A. and Lohikangas, L.** (1997).  
522 Fibronectin-integrin interactions. *Front Biosci* **2**, d126-46.
- 523 **Jones, F. E., Murray, L. S., McNeilly, S., Dean, A., Aman, A., Lu, Y., Nikolova, N.,**  
524 **Malomgre, R., Horsburgh, K., Holmes, W. M. et al.** (2019). 4-Sodium phenyl butyric acid has both  
525 efficacy and counter-indicative effects in the treatment of Col4a1 disease. *Hum Mol Genet* **28**, 628-  
526 638.
- 527 **Keane, T. M., Goodstadt, L., Danecek, P., White, M. A., Wong, K., Yalcin, B., Heger, A.,**  
528 **Agam, A., Slater, G., Goodson, M. et al.** (2011). Mouse genomic variation and its effect on  
529 phenotypes and gene regulation. *Nature* **477**, 289-94.
- 530 **Kuo, D. S., Labelle-Dumais, C., Mao, M., Jeanne, M., Kauffman, W. B., Allen, J., Favor, J.**  
531 **and Gould, D. B.** (2014). Allelic heterogeneity contributes to variability in ocular dysgenesis,  
532 myopathy and brain malformations caused by Col4a1 and Col4a2 mutations. *Hum Mol Genet* **23**,  
533 1709-22.
- 534 **Labelle-Dumais, C., Dilworth, D. J., Harrington, E. P., de Leau, M., Lyons, D., Kabaeva,**  
535 **Z., Manzini, M. C., Dobyys, W. B., Walsh, C. A., Michele, D. E. et al.** (2011). COL4A1 mutations  
536 cause ocular dysgenesis, neuronal localization defects, and myopathy in mice and Walker-Warburg  
537 syndrome in humans. *PLoS Genet* **7**, e1002062.
- 538 **Labelle-Dumais, C., Schuitema, V., Hayashi, G., Hoff, K., Gong, W., Dao, D. Q., Ullian, E.**  
539 **M., Oishi, P., Margeta, M. and Gould, D. B.** (2019). COL4A1 Mutations Cause Neuromuscular  
540 Disease with Tissue-Specific Mechanistic Heterogeneity. *Am J Hum Genet* **104**, 847-860.
- 541 **Laurie, G. W., Bing, J. T., Kleinman, H. K., Hassell, J. R., Aumailley, M., Martin, G. R. and**  
542 **Feldmann, R. J.** (1986). Localization of binding sites for laminin, heparan sulfate proteoglycan and  
543 fibronectin on basement membrane (type IV) collagen. *J Mol Biol* **189**, 205-16.

- 544 **Laurie, G. W., Leblond, C. P. and Martin, G. R.** (1982). Localization of type IV collagen,  
545 laminin, heparan sulfate proteoglycan, and fibronectin to the basal lamina of basement membranes. *J*  
546 *Cell Biol* **95**, 340-4.
- 547 **Livak, K. J. and Schmittgen, T. D.** (2001). Analysis of relative gene expression data using  
548 real-time quantitative PCR and the 2(-Delta Delta C(T)) Method. *Methods* **25**, 402-8.
- 549 **Lukjanenko, L., Jung, M. J., Hegde, N., Perruisseau-Carrier, C., Migliavacca, E., Rozo, M.,**  
550 **Karaz, S., Jacot, G., Schmidt, M., Li, L. et al.** (2016). Loss of fibronectin from the aged stem cell  
551 niche affects the regenerative capacity of skeletal muscle in mice. *Nat Med* **22**, 897-905.
- 552 **Mao, M., Alavi, M. V., Labelle-Dumais, C. and Gould, D. B.** (2015). Type IV Collagens and  
553 Basement Membrane Diseases: Cell Biology and Pathogenic Mechanisms. *Curr Top Membr* **76**, 61-  
554 116.
- 555 **Meuwissen, M. E., Halley, D. J., Smit, L. S., Lequin, M. H., Cobben, J. M., de Coo, R., van**  
556 **Harsseel, J., Sallevelt, S., Woldringh, G., van der Knaap, M. S. et al.** (2015). The expanding  
557 phenotype of COL4A1 and COL4A2 mutations: clinical data on 13 newly identified families and a  
558 review of the literature. *Genet Med* **17**, 843-53.
- 559 **Meyer, K. J. and Anderson, M. G.** (2017). Genetic modifiers as relevant biological variables  
560 of eye disorders. *Hum Mol Genet* **26**, R58-r67.
- 561 **Miyamoto, S., Katz, B. Z., Lafrenie, R. M. and Yamada, K. M.** (1998). Fibronectin and  
562 integrins in cell adhesion, signaling, and morphogenesis. *Ann N Y Acad Sci* **857**, 119-29.
- 563 **Ngandu Mpoyi, E., Cantini, M., Sin, Y. Y., Fleming, L., Zhou, D. W., Costell, M., Lu, Y.,**  
564 **Kadler, K., Garcia, A. J., Van Agtmael, T. et al.** (2020). Material-driven fibronectin assembly  
565 rescues matrix defects due to mutations in collagen IV in fibroblasts. *Biomaterials* **252**, 120090.
- 566 **Parkin, J. D., San Antonio, J. D., Pedchenko, V., Hudson, B., Jensen, S. T. and Savige, J.**  
567 (2011). Mapping structural landmarks, ligand binding sites, and missense mutations to the collagen IV  
568 heterotrimers predicts major functional domains, novel interactions, and variation in phenotypes in  
569 inherited diseases affecting basement membranes. *Hum Mutat* **32**, 127-43.
- 570 **Poschl, E., Schlotzer-Schrehardt, U., Brachvogel, B., Saito, K., Ninomiya, Y. and Mayer,**  
571 **U.** (2004). Collagen IV is essential for basement membrane stability but dispensable for initiation of its  
572 assembly during early development. *Development* **131**, 1619-28.
- 573 **R Core Team.** (2019). R: A language and environment for statistical  
574 computing. Vienna, Austria: R Foundation for Statistical Computing.
- 575 **Ricard-Blum, S.** (2011). The collagen family. *Cold Spring Harb Perspect Biol* **3**, a004978.
- 576 **Rødahl, E., Knappskog, P. M., Majewski, J., Johansson, S., Telstad, W., Kråkenes, J. and**  
577 **Boman, H.** (2013). Variants of anterior segment dysgenesis and cerebral involvement in a large  
578 family with a novel COL4A1 mutation. *Am J Ophthalmol* **155**, 946-53.
- 579 **Sakai, T., Li, S., Docheva, D., Grashoff, C., Sakai, K., Kostka, G., Braun, A., Pfeifer, A.,**  
580 **Yurchenco, P. D. and Fassler, R.** (2003). Integrin-linked kinase (ILK) is required for polarizing the  
581 epiblast, cell adhesion, and controlling actin accumulation. *Genes Dev* **17**, 926-40.
- 582 **Samuelsson, A. R., Belvindrah, R., Wu, C., Muller, U. and Halfter, W.** (2007). Beta1-integrin  
583 signaling is essential for lens fiber survival. *Gene Regul Syst Bio* **1**, 177-89.
- 584 **Sen, S. and Churchill, G. A.** (2001). A statistical framework for quantitative trait mapping.  
585 *Genetics* **159**, 371-87.
- 586 **Shah, S., Ellard, S., Kneen, R., Lim, M., Osborne, N., Rankin, J., Stoodley, N., van der**  
587 **Knaap, M., Whitney, A. and Jardine, P.** (2012). Childhood presentation of COL4A1 mutations. *Dev*  
588 *Med Child Neurol* **54**, 569-74.
- 589 **Sibon, I., Coupry, I., Menegon, P., Bouchet, J. P., Gorry, P., Burgelin, I., Calvas, P.,**  
590 **Orignac, I., Dousset, V., Lacombe, D. et al.** (2007). COL4A1 mutation in Axenfeld-Rieger anomaly  
591 with leukoencephalopathy and stroke. *Ann Neurol* **62**, 177-84.
- 592 **Teo, Z. L., McQueen-Miscamble, L., Turner, K., Martinez, G., Madakashira, B., Dedhar, S.,**  
593 **Robinson, M. L. and de longh, R. U.** (2014). Integrin linked kinase (ILK) is required for lens  
594 epithelial cell survival, proliferation and differentiation. *Exp Eye Res* **121**, 130-42.

- 595 **Thaung, C., West, K., Clark, B. J., McKie, L., Morgan, J. E., Arnold, K., Nolan, P. M.,**  
596 **Peters, J., Hunter, A. J., Brown, S. D. et al.** (2002). Novel ENU-induced eye mutations in the  
597 mouse: models for human eye disease. *Hum Mol Genet* **11**, 755-67.
- 598 **Vahedi, K., Kubis, N., Boukobza, M., Arnoult, M., Massin, P., Tournier-Lasserre, E. and**  
599 **Bousser, M. G.** (2007). COL4A1 mutation in a patient with sporadic, recurrent intracerebral  
600 hemorrhage. *Stroke* **38**, 1461-4.
- 601 **Vandenberg, P., Kern, A., Ries, A., Luckenbill-Edds, L., Mann, K. and Kuhn, K.** (1991).  
602 Characterization of a type IV collagen major cell binding site with affinity to the alpha 1 beta 1 and the  
603 alpha 2 beta 1 integrins. *J Cell Biol* **113**, 1475-83.
- 604 **Vaser, R., Adusumalli, S., Leng, S. N., Sikic, M. and Ng, P. C.** (2016). SIFT missense  
605 predictions for genomes. *Nat Protoc* **11**, 1-9.
- 606 **Vieira, N. M., Elvers, I., Alexander, M. S., Moreira, Y. B., Eran, A., Gomes, J. P., Marshall,**  
607 **J. L., Karlsson, E. K., Verjovski-Almeida, S., Lindblad-Toh, K. et al.** (2015). Jagged 1 Rescues  
608 the Duchenne Muscular Dystrophy Phenotype. *Cell* **163**, 1204-1213.
- 609 **Vilain, C., Van Regemorter, N., Verloes, A., David, P. and Van Bogaert, P.** (2002).  
610 Neuroimaging fails to identify asymptomatic carriers of familial porencephaly. *Am J Med Genet* **112**,  
611 198-202.
- 612 **White, E. S., Baralle, F. E. and Muro, A. F.** (2008). New insights into form and function of  
613 fibronectin splice variants. *J Pathol* **216**, 1-14.
- 614 **Yoneda, Y., Haginoya, K., Kato, M., Osaka, H., Yokochi, K., Arai, H., Kakita, A.,**  
615 **Yamamoto, T., Otsuki, Y., Shimizu, S. et al.** (2013). Phenotypic spectrum of COL4A1 mutations:  
616 porencephaly to schizencephaly. *Ann Neurol* **73**, 48-57.
- 617 **Zagaglia, S., Selch, C., Nisevic, J. R., Mei, D., Michalak, Z., Hernandez-Hernandez, L.,**  
618 **Krithika, S., Vezyroglou, K., Varadkar, S. M., Pepler, A. et al.** (2018). Neurologic phenotypes  
619 associated with COL4A1/2 mutations: Expanding the spectrum of disease. *Neurology* **91**, e2078-  
620 e2088.
- 621 **Zollinger, A. J. and Smith, M. L.** (2017). Fibronectin, the extracellular glue. *Matrix Biol* **60-61**,  
622 27-37.

## FIGURE LEGENDS

**Figure 1. A genome-wide screen identified a single modifier locus on Chr 1 for ASD and myopathy.** (A) Schematic representation of the (CAST X B6) F<sub>2</sub> cross. One hundred ninety two mutant (CAST X B6-*Col4a1*<sup>+/ $\Delta$ ex41</sup>) F<sub>2</sub> progeny were genotyped and phenotyped for ASD. (B) Representative slit-lamp images illustrating scoring of ASD severity: mild, score = 1; moderate, score = 2; severe, score = 3. (C) A one-dimensional genome scan identified a locus on Chr 1 for ASD (max. LOD score = 11.2, 99% Bayesian confidence interval extending from 51.3 - 73.0 Mb, Ensembl GRCm38.p6). Solid horizontal line, 5% false positive threshold; dashed horizontal line, 10% threshold. (D) A genome-wide scan conditioned on the Chr 1 modifier locus suggests that no other single locus has a strong effect on ASD. Dashed horizontal line: 20% false positive threshold. (E) Representative images of cross sections from quadriceps stained with H&E showing variable myopathy severity in *Col4a1*<sup>+/ $\Delta$ ex41</sup> mice with different genetic backgrounds. Arrows indicate muscle fibers with NPN. Scale bar = 20  $\mu$ m. (F) To identify skeletal muscle modifier loci, a subset (49) of the 192 (CAST X B6) F<sub>2</sub> progeny was assessed for myopathy. One dimensional genome scan identified a myopathy modifier at the same position as the ASD modifier (Max. LOD score = 5.61).

**Figure 2. An incipient congenic strain containing the CAST-derived *MoGS1* locus suppressed ASD and myopathy, but not ICH.** (A) Evaluation of eyes from the incipient congenic mice at N5F2 validates *MoGS1* as a genetic suppressor of ASD. The bar graph shows the percentage of eyes at each ASD severity level from *Col4a1*<sup>+/ $\Delta$ ex41</sup> mice that are homozygous for B6 alleles (B/B), heterozygous or homozygous for CAST alleles (C/B and C/C, respectively) in the congenic interval. ASD for *Col4a1*<sup>+/ $\Delta$ ex41</sup> mice on the pure B6 and CASTB6F1 backgrounds are also shown. \**p* < 0.05; \*\*\*\**p* < 0.0001, by Kruskal-Wallis test followed by Dunn's multiple comparison test. (B) Evaluation of muscles from the N5F2 congenic mice validates *MoGS1* as a genetic suppressor of skeletal myopathy. Data are presented as mean  $\pm$  SEM. \**p* < 0.05, by one-way ANOVA followed by Tukey's multiple comparison test. (C) Penetrance of porencephaly for *Col4a1*<sup>+/ $\Delta$ ex41</sup> mice with different genetic backgrounds was determined by brain histology. Top representative images show absence or presence of porencephaly. \* marks brain area with porencephaly. (D) ICH in mice was assessed using Perl's Prussian blue staining. Data for each mouse are shown as a percentage of brain area with Prussian blue staining averaged over 28 sections from each brain. Representative images of Prussian blue-stained brain sections and respective Prussian blue staining quantification are shown above the graphs. Sample sizes are indicated in parentheses. Data are presented as mean  $\pm$  SEM. \**p* < 0.05, Student's t-test for comparison between B6 and CASTB6F1; One-way ANOVA followed by Tukey's test for multiple comparisons between B/B, C/B, and C/C.

659

660 **Figure 3. Fine mapping of the *MoGS1* locus.** (A) Schematic illustration of subcongenic lines  
661 containing different intervals of the CAST modifier locus backcrossed onto the B6 background for 5  
662 generations. Subcongenic Line 2 (68723089 – 72973981bp on Chr 1, Ensembl GRCm38.p6)  
663 ameliorated ASD and myopathy severity. Black line, chromosome fragments from B6; grey bar,  
664 chromosome fragments from CAST. CI, critical interval. (B) Analyses of ASD severity in mice  
665 homozygous for B6 alleles (B/B), heterozygous or homozygous for CAST alleles (C/B and C/C,  
666 respectively) at the refined distal interval. Percentage of eyes at each ASD severity level was shown.  
667 \*\*\* $p < 0.001$  by Kruskal-Wallis test followed by Dunn's multiple comparison test. (C) Analysis of  
668 myopathy by NPN showing severity in mice with different genotypes at the refined distal interval.  
669 Sample size indicated in parentheses. Data are presented as mean  $\pm$  SEM. \* $p < 0.05$ , one-way ANOVA  
670 followed by Tukey's multiple comparison test.

671

672 **Figure 4. Evaluating FN1 as a candidate modifier gene.** (A) Quantitative qPCR analysis showed  
673 increased expression of *Fn1* mRNA in P0 eyes from *Col4a1*<sup>+/+</sup> mice homozygous for the CAST interval  
674 at the refined *MoGS1* locus (+/+;C/C) compared to mice homozygous for the B6 interval (+/+;B/B).  $n =$   
675 4 per genotype. Data are presented as mean  $\pm$  SEM. \* $p < 0.05$ , by Student's t-test. (B-C)  
676 Representative images (B) and quantification (C) of Western-blot analyses of P10 quadriceps showing  
677 a trend towards increased FN1 protein levels in mice homozygous for CAST alleles at the refined  
678 *MoGS1* locus (+/+;C/C and +/ $\Delta$ ex41;C/C) compared to mice homozygous for B6 alleles (+/+;B/B and  
679 +/ $\Delta$ ex41;B/B). ILK levels were increased in *Col4a1*<sup>+/ $\Delta$ ex41</sup> mice irrespective of the genotype at the  
680 *MoGS1* locus (+/ $\Delta$ ex41;B/B and +/ $\Delta$ ex41;C/C,  $p = 0.06$  for *MoGS1*<sup>C/C</sup>) compared to their corresponding  
681 *Col4a1*<sup>+/+</sup> controls (+/+;B/B, and +/+;C/C, respectively). Ratios of pFAK/FAK, were significantly elevated  
682 in *Col4a1*<sup>+/ $\Delta$ ex41</sup> mice homozygous for *MoGS1* B6 alleles (+/ $\Delta$ ex41;B/B) but not CAST alleles  
683 (+/ $\Delta$ ex41;C/C) ( $p = 0.35$ ) compared to their corresponding *Col4a1*<sup>+/+</sup> controls (+/+;B/B, and +/+;C/C,  
684 respectively) suggesting altered integrin signaling that is partially restored by the *MoGS1* locus. Levels  
685 of ITBG1 did not differ between genotypes.  $n = 4, 5, 5, 5$  for +/+;B/B, +/ $\Delta$ ex41;B/B, +/+;C/C and  
686 +/ $\Delta$ ex41;C/C respectively. Data are presented as mean  $\pm$  SEM. \* $p < 0.05$ , \*\* $p < 0.01$  by one-way  
687 ANOVA followed by Sidak's multiple comparison test.

688

689 **Figure S1. Subcongenic Line 1 did not confer the modifier effect.** (A-B) A ~10 Mb proximal portion  
690 of the CAST *ModGS1* locus (52418578-61808145bp on Chr 1, Ensembl GRCm38.p6) showed no  
691 protective effect for ASD (A) or skeletal myopathy (B) phenotypes seen in *Col4a1*<sup>+/ $\Delta$ ex41</sup> mice. Sample

692 size indicated in parentheses. Data are presented as mean  $\pm$  SEM. one-way ANOVA followed by  
693 Tukey's multiple comparison test.

694

695 **Table S1. List of protein-coding and non-coding genes in the *ModGS1* locus.**

696

697 **Table S2. SNPs, small InDels and structural variants in *Fn1*.**

698

699 **Table S3. Primer sequences for quantitative PCR.**





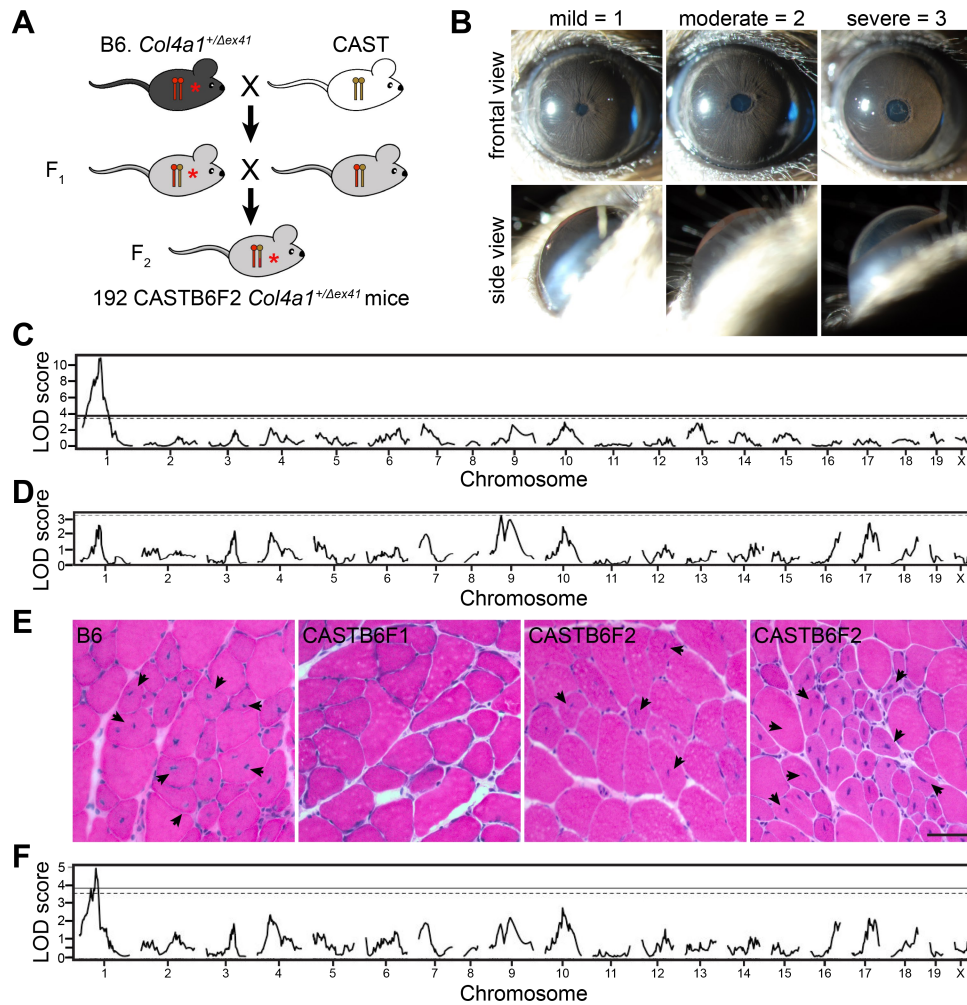

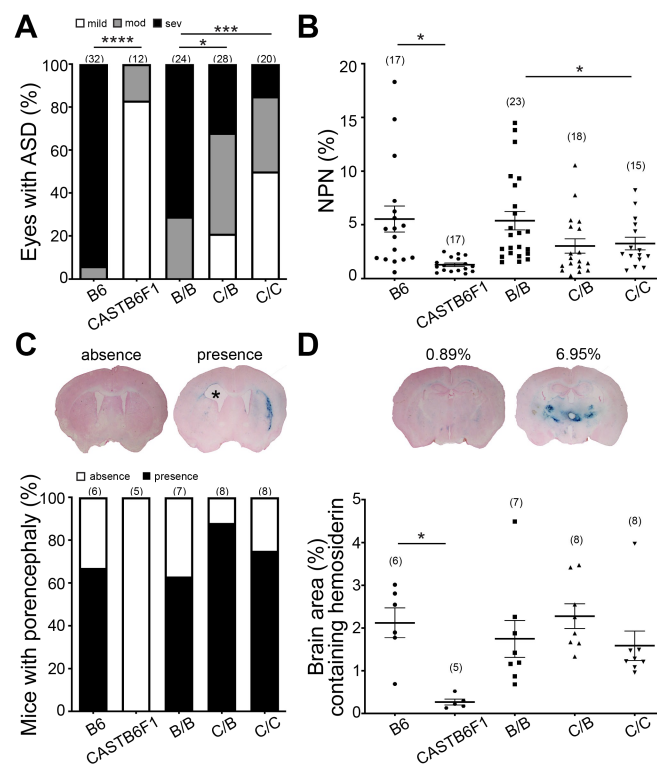

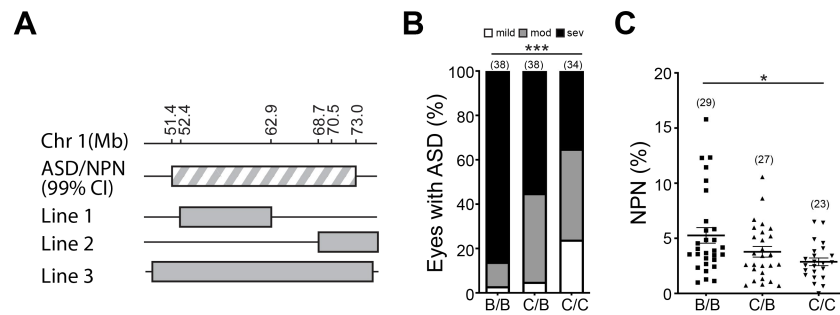

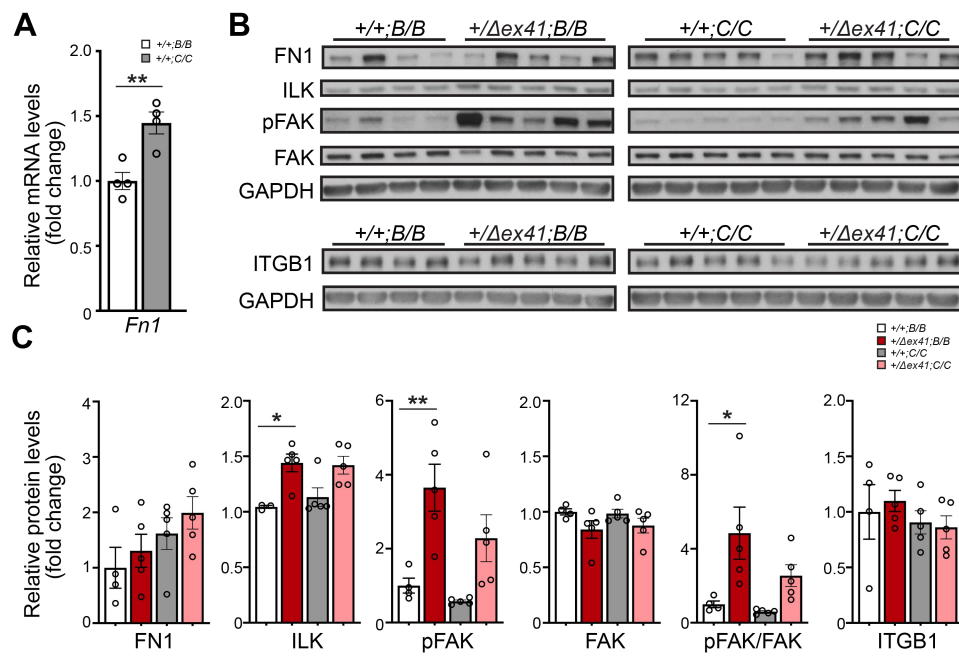

Source: https://www.biorxiv.org/content/10.1101/2020.11.06.371666v1.full.pdf
